# Supplementary material for: Introducing large-radius elements in layered perovskite for low-voltage lithium storage
Source: Royal Society of Chemistry journal article supplement (doi:10.1039/d3ta01069d), 2023-01-01
Supplement: d3ta01069d1.pdf [file d3ta01069d1.pdf]

## Introducing large-radius elements into layered perovskite for low-voltage lithium storage

Xiao Li<sup>a</sup>, Diming Xu<sup>a</sup>, Di Zhou<sup>a\*</sup>, Hu Nan<sup>a</sup>, Shengzhao Pang<sup>b</sup>, Moustafa Adel Darwish<sup>c</sup>, Tao Zhou<sup>d</sup>, Shi-Kuan Sun<sup>e</sup>.

<sup>a</sup>Multifunctional Materials and Structures, Key Laboratory of the Ministry of Education & International Center for Dielectric Research, School of Electronic Science and Engineering, Xi'an Jiaotong University, Xi'an, 710049, PR China

<sup>b</sup>Unmanned System Research Institute, Northwestern Polytechnical University, Xi'an, 710072, PR China

<sup>c</sup>Physics Department, Faculty of Science, Tanta University, Al-Geish st., Tanta 31527, Egypt

<sup>d</sup>School of Electronic and Information Engineering, Hangzhou Dianzi University, Hangzhou, 310018, PR China

<sup>e</sup>School of Material Science and Energy Engineering, Foshan University, Foshan, Guangdong, 528000, PR China

\*E-mail: zhouidi1220@xjtu.edu.cn

**Table S1** Parameters of LiSmTiO<sub>4</sub>.

|                      | <i>a</i> (Å) | <i>b</i> (Å) | <i>c</i> (Å) | $\alpha/\beta/\gamma$ |
|----------------------|--------------|--------------|--------------|-----------------------|
| LiSmTiO <sub>4</sub> | 11.557961    | 5.350223     | 5.345824     | 90 °                  |

**Table S2** Fractional atomic parameters of LiSmTiO<sub>4</sub> with *Pbcm* space group.

| atom | site       | <i>x</i> | <i>y</i> | <i>z</i> | occupancy |
|------|------------|----------|----------|----------|-----------|
| Li   | 4 <i>d</i> | 0.522327 | 0.522327 | 0.000000 | 1         |
| Sm   | 4 <i>d</i> | 0.877723 | 0.012580 | 0.250000 | 1         |
| Ti   | 4 <i>d</i> | 0.298715 | 0.005600 | 0.250000 | 1         |
| O1   | 4 <i>c</i> | 0.260215 | 0.250000 | 0.000000 | 1         |
| O2   | 4 <i>c</i> | 0.734028 | 0.250000 | 0.000000 | 1         |
| O3   | 4 <i>d</i> | 0.099685 | 0.922669 | 0.250000 | 1         |
| O4   | 4 <i>d</i> | 0.475755 | 0.080721 | 0.250000 | 1         |

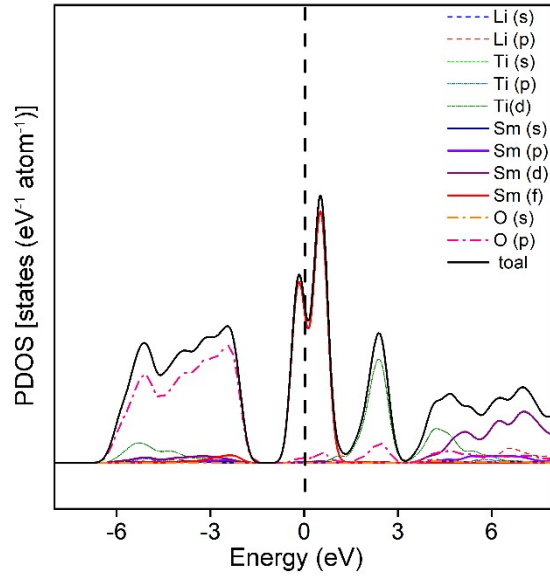

**Figure S1. Projected density of states (PDOS) for pristine LSTO.**

The Vienna Ab-initio Simulation Package (VASP) package with density functional theory (DFT) was used for the calculations. The electronic exchange-correlation energy was determined using the Perdew–Burke–Ernzerhof functional within the generalized gradient approximation. The cutoff energy was set to 400 eV, and the convergence criteria were  $1.0 \times 10^{-3}$  eV for energy and  $0.01 \text{ eV } \text{\AA}^{-1}$  for stress. The projected density of states (PDOS) of LSTO was calculated using a Monkhorst–Pack grid of  $4 \times 8 \times 8$  k-points. The crystal structure of LSTO was optimized using a bulk structure consisting of four LSTO units ( $[\text{LSTO}]_4$ ).

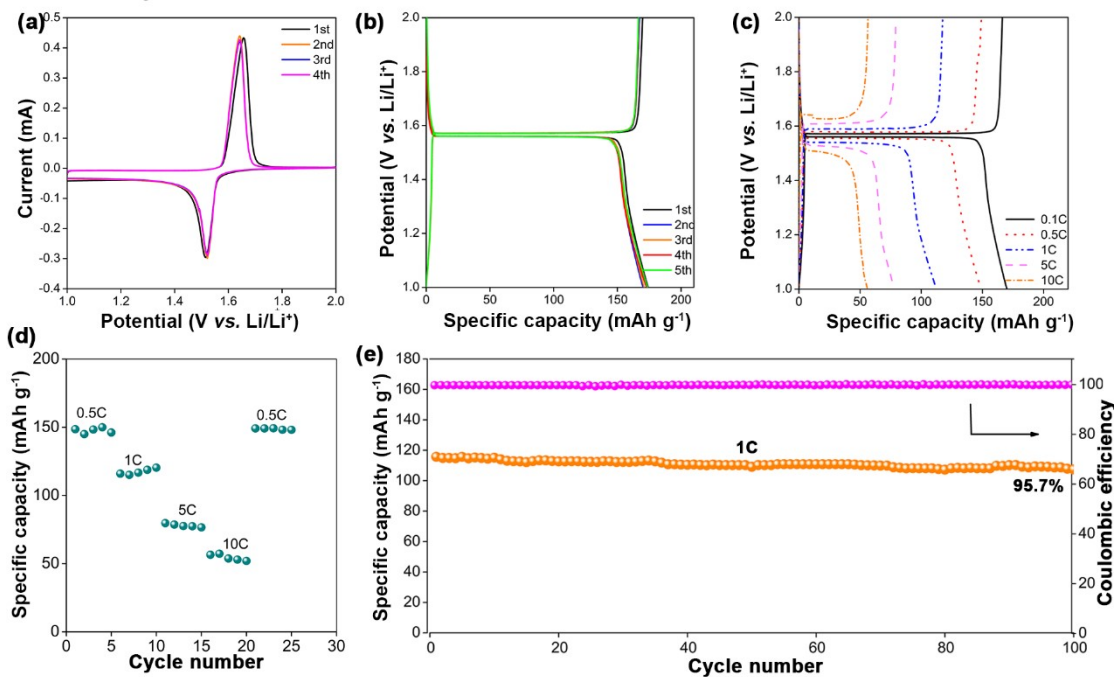

**Figure S2. Electrochemical performance of  $\text{Li}_4\text{Ti}_5\text{O}_{12}/\text{Li}$  half cell.** (a) CV curves measured at a sweep rate of  $0.2 \text{ mV s}^{-1}$ . (b) the first five galvanostatic discharge and charge curves of the  $\text{Li}_4\text{Ti}_5\text{O}_{12}$  in a half-cell configuration. (c,d) Galvanostatic discharge and charge curves from 0.1C up to 10C and corresponding rate performance summary based on galvanostatic capacity. (e) The cycle performance of  $\text{Li}_4\text{Ti}_5\text{O}_{12}$  at 1C.

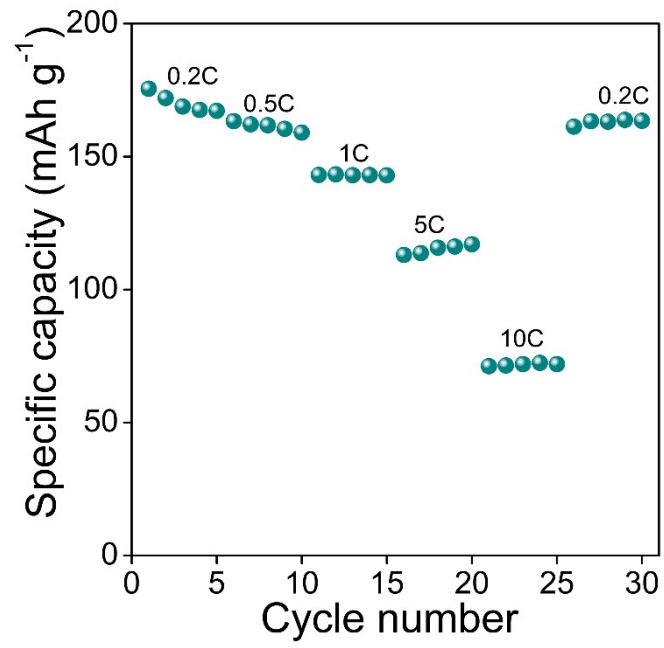

**Figure S3.** The corresponding rate performance summary based on galvanostatic capacity.

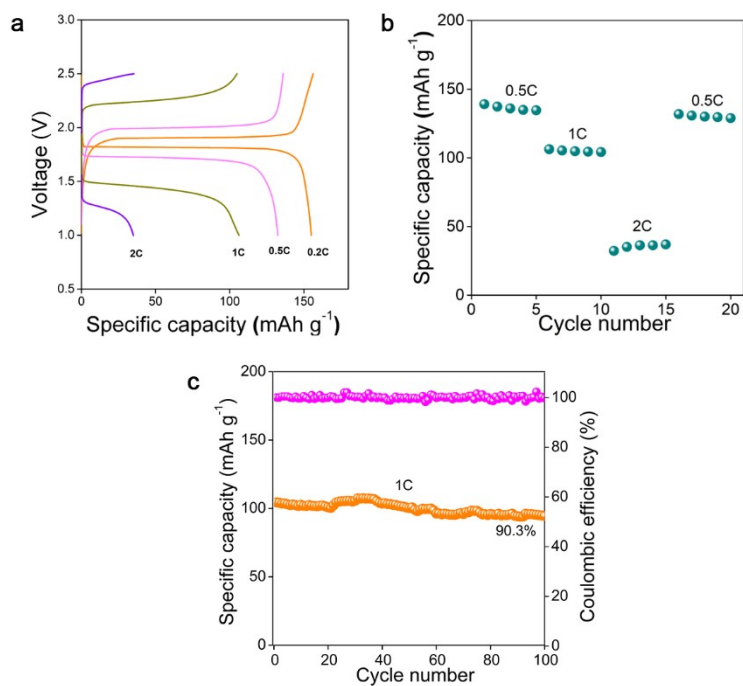

**Figure S4. Electrochemical performance of the  $\text{LiFePO}_4 \parallel \text{Li}_4\text{Ti}_5\text{O}_{12}$  full cell.** (a) Charge-discharge curves at various current rates from 0.2C to 2C from 1.0 V to 2.5 V. (b) The corresponding rate performance summary based on galvanostatic capacity. (c) The cycling stability at 1C over 100 cycles and corresponding Coulombic efficiency of the  $\text{LiFePO}_4 \parallel \text{Li}_4\text{Ti}_5\text{O}_{12}$  full cell.

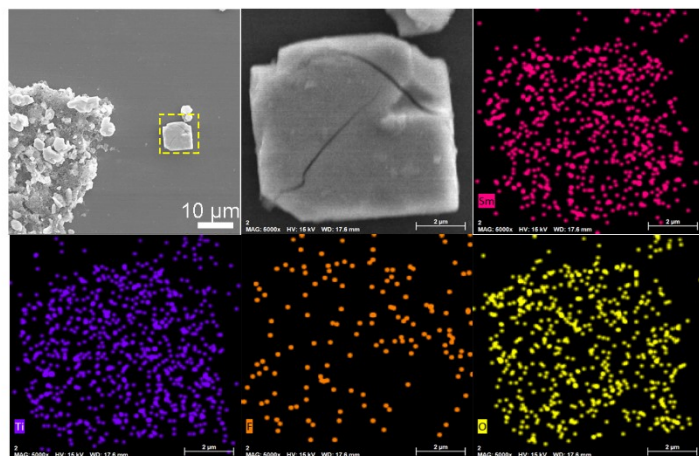

**Figure S5. EDS mapping of the electrode after 10 cycles.**

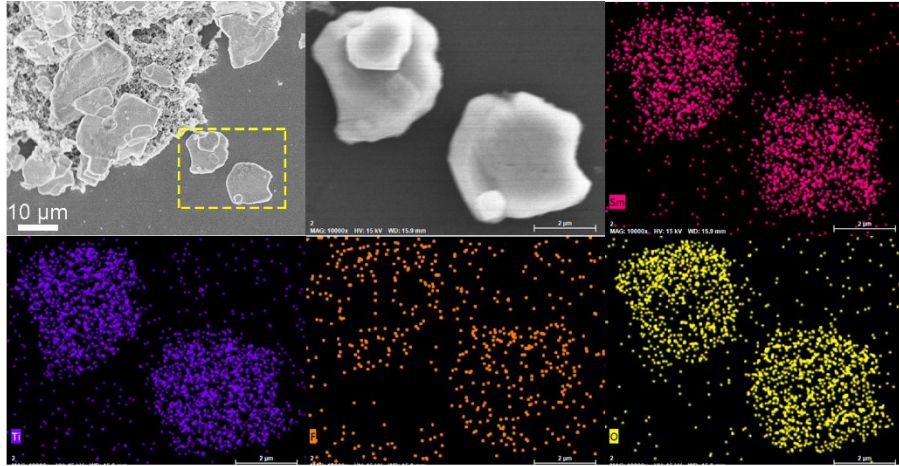

**Figure S6. EDS mapping of the electrode after 100 cycles.**
